# Supplementary material for: Comparative Clinical Evaluation of 3 Artificial Intelligence Algorithms for Breast Cancer Screening with Mammography
Source: Preprints.org preprint supplement (doi:10.20944/preprints202401.1706.v1), 2024-01-24
Supplement: Supplementary file 1 [file supplementary]

**Supplementary table - Confidence interval**

| AI 1 - Breast analysis | Results | confidence interval |
| --- | --- | --- |
| Se | 74% | 65.30%-81.48% |
| Sp | 79% | 75.19%-82.48% |
| PPV | 46.2% | 39.08%-53.42% |
| NPV | 93% | 89.68%-94.87% |
|  |  |  |
|  |  |  |
| AI 2 - Breast analysis |  |  |
| Se | 52% | 42.84%-61.12% |
| Sp | 98,4% | 96.90%-99.31% |
| PPV | 88.9% | 79.28%-95.08% |
| NPV | 89.4% | 86.53%-91.82% |
|  |  |  |
|  |  |  |
| AI 3- Breast analysis |  |  |
| Se | 69.9% | 61.00%-77.86% |
| SP | 45.4% | 40.94-49.80% |
| PPV | 23.8% | 19.46%-28.48% |
| NPV | 86.1% | 81.34%-90.01% |
